# Supplementary material for: Diffusion weighted and dynamic contrast enhanced MRI as an imaging biomarker for stereotactic ablative body radiotherapy (SABR) of primary renal cell carcinoma
Source: PubMed Central journal article supplement (PMC6095575; doi:10.1371/journal.pone.0202387), 2018-08-16
Supplement: pone.0202387.s007.pdf [file pone.0202387.s007.pdf]

**Table S1: The number of days between each CT and MRI scan and the start of SABR treatment.**

| Patient #                | CT                      |                       |                       |                       |                        | MRI                   |                             |                             |
|--------------------------|-------------------------|-----------------------|-----------------------|-----------------------|------------------------|-----------------------|-----------------------------|-----------------------------|
|                          | Baseline CT (days)      | 6 month CT (days)     | 12 month CT (days)    | 24 month CT (days)    | Last CT (days)         | Baseline MRI (days)   | Follow-up MRI scan 1 (days) | Follow-up MRI scan 2 (days) |
| 1                        | -79                     | 200                   | 388                   | 794                   | 794                    | -51                   | 17                          | 69                          |
| 2                        | -99                     | 173                   | 364                   | 831                   | 1085                   | -56                   | 9                           | 70                          |
| 3                        | -77                     | -                     | 367                   | 739                   | 739                    | -62                   | 14                          | 162                         |
| 4                        | -71                     | 144                   | 339                   | 724                   | 724                    | -52                   | 39                          | 68                          |
| 5                        | -90                     | -                     | 355                   | 694                   | 883                    | -37                   | 32                          | 112                         |
| 6                        | -180                    | 202                   | 377                   | 748                   | 790                    | -49                   | 14                          | 68                          |
| 7                        | -119                    | 212                   | 405                   | 677                   | 782                    | -28                   | 14                          | 62                          |
| 8                        | -134                    | 192                   | 384                   | 733                   | 733                    | -28                   | 14                          | 119                         |
| 9                        | -100                    | 138                   | 355                   | -                     | 544                    | -53                   | 16                          | 77                          |
| 10                       | -133                    | 182                   | 385                   | -                     | 385                    | -29                   | 59                          | 119                         |
| 11                       | -56                     | 168                   | 357                   | 715                   | 715                    | -16                   | 14                          | 56                          |
| 12                       | -231                    | 149                   | 364                   | 661                   | 1010                   | -23                   | 15                          | 70                          |
| <b>Median (min, max)</b> | <b>-100 (-56, -231)</b> | <b>178 (138, 212)</b> | <b>366 (339, 405)</b> | <b>729 (661, 831)</b> | <b>761 (385, 1085)</b> | <b>-43 (-62, -16)</b> | <b>15 (9, 59)</b>           | <b>70 (56, 162)</b>         |
